## 1 **Pooling nasopharyngeal swab specimens to increase testing capacity for SARS-CoV-2**

2 Cole Anderson<sup>1</sup>, Fritz Castillo<sup>1</sup>, Michael Koenig<sup>1</sup>, Jim Managbanag<sup>1</sup>

3

4 1. Department of Pathology, Landstuhl Regional Medical Center, United States Army

5

6 | Address correspondence to Cole Anderson, [cole.p.anderson.mil@mail.mil](mailto:cole.p.anderson.mil@mail.mil)

7

8

### 9 **Abstract:**

10 The recent emergence of SARS-CoV-2 has lead to a global pandemic of unprecedented  
11 proportions. Current diagnosis of COVID-19 relies on the detection of SARS-CoV-2 RNA by RT-  
12 PCR in upper and lower respiratory specimens. While sensitive and specific, these RT-PCR  
13 assays require considerable supplies and reagents, which are often limited during global  
14 pandemics and surge testing. Here, we show that a nasopharyngeal swab pooling strategy can  
15 detect a single positive sample in pools of up to 10 samples without sacrificing RT-PCR  
16 sensitivity and specificity. We also report that this pooling strategy can be applied to rapid,  
17 moderate complexity assays, such as the BioFire COVID-19 test. Implementing a pooling  
18 strategy can significantly increase laboratory testing capacity while simultaneously reducing  
19 turnaround times for rapid identification and isolation of positive COVID-19 cases in high risk  
20 populations.

21

### 22 **Introduction:**

23 In December 2019, an outbreak of pneumonia with unknown origin began in Wuhan city, the  
24 capital of Hubei province in China<sup>1</sup>. The following month, Chinese researchers had isolated a  
25 novel coronavirus, severe acute respiratory syndrome coronavirus 2 (SARS-CoV-2), from

26 patients with viral pneumonia<sup>2</sup>. Pneumonia associated with SARS-CoV-2 was later designated  
27 as coronavirus disease 2019 (COVID-19) by the World Health Organization in February 2020<sup>3</sup>.  
28 It was determined that after a zoonotic transmission event in Wuhan city<sup>4</sup>, widespread person-  
29 to-person transmission quickly occurred that led to the infection and death of over 80,000 and  
30 3,000 people in China, respectively. To date, according to the WHO, there have been 4,258,666  
31 reported cases of COVID-19, including 294,190 deaths worldwide<sup>5</sup>.  
32 Since the initial outbreak in China, COVID-19 has been declared a global pandemic affecting at  
33 least 216 other countries, territories or areas. To monitor and diagnose COVID-19, the US Food  
34 and Drug Administration (FDA) approved an emergency use authorization (EUA) for the CDC  
35 2019-nCoV Real-Time RT-PCR Diagnostic Panel on February 4, 2020<sup>6</sup>. This protocol allows for  
36 the rapid detection of SARS-CoV-2 RNA from clinical specimens such as, nasopharyngeal and  
37 oropharyngeal swabs, sputum, bronchoalveolar lavage, and tracheal aspirates. As evidenced by  
38 the ongoing SARS-CoV-2 pandemic, increased demand for testing can overwhelm diagnostic  
39 laboratories and lead to drastic shortages in supplies and reagents. A strategy to overcome  
40 high testing demand is to pool specimens before RNA extraction, test pools, and then retest  
41 individual specimens from positive pools. Similar strategies have shown to increase testing  
42 capacity for the detection of common infectious diseases such as influenza, HIV, Hepatitis, and  
43 *Chlamydia trachomatis*<sup>7-11</sup>.  
44 In this study, we examined the feasibility of pooling nasopharyngeal swab specimens submitted  
45 for COVID-19 testing using the CDC 2019-nCoV RT-PCR diagnostic panel without compromising  
46 clinical sensitivity. Our data shows that pooling respiratory samples during times of increased

47 volume and low disease prevalence can save time and reagents without significant  
48 modifications to laboratory infrastructure or workflow.

49

50 **Methods:**

51 This study was determined to meet the exempt criteria listed in 32CFR219.104(d) from the  
52 Landstuhl Regional Medical Center Exempt Determination Official.

53 During an outbreak cluster of SARS-CoV-2 in Stuttgart, Germany, 494 nasopharyngeal (NP)  
54 swabs were collected and placed into 1.0 ml of normal saline. Specimens were submitted to  
55 the Virology laboratory at Landstuhl Regional Medical Center for routine SARS-CoV-2 testing  
56 using the CDC 2019-nCoV RT-PCR assay. Post clinical testing, specimens were de-identified and  
57 randomly assigned into pools of 10 to create 50 distinct pools (the 50<sup>th</sup> pool contained 4  
58 specimens diluted in 0.6 ml of transport media). Pools were created by combining 100 ul of  
59 each specimen to create 1.0 ml pools. Viral transport media was added to each pool at a 1:1  
60 ratio for nucleic acid extraction performed on the Roche MagNA Pure 24 platform using the  
61 MagNA Pure 24 Total NA Isolation kit (Roche). Elution volume was set to 50 ul to concentrate  
62 viral RNA. Each round of extraction contained a human specimen control to monitor for PCR  
63 inhibition and specimen quality.

64 Detection of SARS-CoV-2 was performed using the CDC RT-PCR COVID-19 assay, which contains  
65 primers and Taqman probes for two specific regions of the SARS-CoV-2 nucleocapsid (N) gene  
66 and the human Rnase-P (RP) gene, which is used as an internal positive control for human  
67 nucleic acid. PCR was performed according to the CDC protocol using the TaqPath 1-Step RT-  
68 qPCR Master Mix, CG kit (Life Technologies) on the Applied Biosystems (ABI) 7500 Fast real-

69 time PCR system. PCR results were interpreted as recommended in the CDC RT-PCR COVID-19  
70 instructions for use. A pool was considered positive if the  $C_T$  was less than 40. Detection of  
71 SARS-CoV-2 in pooled samples using the BioFire COVID-19 Test was performed according to the  
72 manufacturer's instructions for use on the BioFire FilmArray 2.0 and FilmArray Torch systems.

73 | All statistical analyses were conducted using Graphpad Prism 6.0.  
74

## 75 **Results:**

76 The prevalence for individual clinical samples was 4% (19/494) for SARS-CoV-2 RNA. Among the  
77 pooled samples, 30% (15/50) were positive for SARS-CoV-2 RNA, while the remaining 70%  
78 (35/50) did not have detectable levels of SARS-CoV-2 RNA (**Table 1**). We observed one  
79 inconclusive RT-PCR result in our pooled analysis as defined by amplification of only a single  
80 SARS-CoV-2 target. In this case, the N2 target for pool 41 failed to amplify while N1 was  
81 detected with a relatively high  $C_T$  (37.3). There were no invalid reactions in our analysis, as  
82 defined by reactions where Rnase-P failed to amplify. Out of the 15 positive pools, 4 pools  
83 contained 2 positive specimens, while the remaining 11 pools contained only 1 positive  
84 specimen (**Table 2**). The mean  $C_T$  value and standard deviation for N1 and N2 of the pools were  
85 29.2 (4.4) and 29.4 (4.3), respectively. Similarly, the mean  $C_T$  values of individual positive  
86 specimens were 28.0 (4.5) and 29.9 (4.8) for N1 and N2, respectively. Despite dilution, there  
87 was no significant difference in mean  $C_T$  value between the pooled and individually tested  
88 specimens (**Figure 1**).

89 To determine if a pooling approach is feasible with rapid, moderate complexity tests, we tested  
90 the 15 SARS-CoV-2 positive pools and 15 of the SARS-CoV-2 negative pools using the recently

91 released BioFire COVID-19 Test. The BioFire COVID-19 test is a nested multiplexed RT-PCR test  
92 that automates all aspects of nucleic acid testing including sample preparation, extraction, and  
93 PCR, and which can detect SARS-CoV-2 within a single nasopharyngeal swab specimen in under  
94 60 minutes. As expected, there was perfect agreement between the CDC 2019-nCoV RT-PCR  
95 and BioFire COVID-19 assays ( $\kappa=1.0$ ). SARS-CoV-2 RNA was detected in all 15 positive  
96 pools, whereas SARS-CoV-2 RNA was not detected in all 15 of the negative pools using the  
97 BioFire COVID-19 Test (**Table 3**).

98

#### 99 **Discussion:**

100 We found that a single NP swab specimen containing SARS-CoV-2 RNA can be consistently  
101 detected in a pool of 10 samples. Our data shows an estimated false negative rate of  
102 approximately 7% (1 out of 15), although this pool was inconclusive (the N2 primer failed to  
103 amplify) and was treated as a positive pool. Unlike other pooling strategies that pool purified  
104 RNA extracts<sup>12,13</sup>, our method utilized pooling clinical specimens prior to RNA extraction, which  
105 removes the extraction bottleneck and allows running an endogenous internal control to  
106 monitor extraction quality.

107 A linear increase in threshold cycle is expected as specimens are pooled, however, we did not  
108 observe a significant change in  $C_T$  values for either primer pair in our pooled samples. Given  
109 that PCR efficiency of each primer pair can differ, any inconclusive result for a pool should be  
110 treated as positive and individually tested. Case in point, the only inconclusive result in our  
111 study was found in pool 41, where the N2 target failed to amplify. This pool contained 2  
112 positive specimens and one inconclusive specimen. This suggests there may have been PCR

113 inhibitors present in the individual sample that carried over to the pooled specimen resulting in  
114 an inconclusive result. Both positive specimens in pool 41 had relatively high  $C_T$  values. In our  
115 lab, specimens with high  $C_T$  values are commonly observed in convalescent patients 14-30 days  
116 after symptomatic infection, and do risk escaping detection when combined in larger pools due  
117 to loss of sensitivity. It should also be noted that a negative pool result would not differentiate  
118 between a true negative and an inconclusive or invalid result due to improper sample collection  
119 or storage. Given the clinical performance of this and other published pooling protocols<sup>7,12,13</sup>, it  
120 is possible that larger pools could be used with further RT-PCR optimization to allow lower  
121 detection limits for low-concentration RNA.

122 Disease prevalence should also be taken into consideration when implementing a pooling  
123 strategy. Recently, Noriega and Samore used a Bayesian modeling approach to show testing  
124 throughput more than doubles when prevalence rates are  $\leq 8\%$ , and this occurs with optimal  
125 pool sizes between 4 and 12 samples. Conversely, as prevalence increases, they show  
126 improvements in testing throughput diminishes significantly<sup>14</sup>. During this surveillance period,  
127 SARS-CoV-2 prevalence was determined to be approximately 4% (19/494), which is ideal for  
128 pool sizes of 10. In this study, we found that 30% (15/50) pools were positive for SARS-CoV-2,  
129 which equates to 200 individual extractions and RT-PCR reactions (50 pools and 150  
130 individuals), representing a 60% savings in extractions and RT-PCR reactions, which is significant  
131 during times of surge testing and in limited-resource situations.

132 Recently, numerous rapid molecular diagnostic platforms have received an Emergency Use  
133 Authorization from the FDA. These include low to moderate complexity assays from BioFire,  
134 Cepheid, and Abbott that can detect SARS-CoV-2 in approximately 1 hour<sup>15,16</sup>. Using the

135 recently released BioFire COVID-19 Test, we found that this platform could reliably detect a  
136 single positive sample in pools of up to 10 specimens, with equal rates of detection as the CDC  
137 COVID-19 RT-PCR assay. This is not surprising given the published limits of detection for the  
138 CDC COVID-19 RT-PCR and BioFire COVID-19 test are in the range of  $10^2$  RNA copies/ml. These  
139 results support the use of rapid molecular diagnostic platforms for routine disease surveillance  
140 of critical working groups such as healthcare providers and military units, where large-scale  
141 quarantines can have grave consequences.

142 In summary, we show that a pooled-sample strategy can augment a laboratory's testing  
143 capability and relieve extreme pressure from limited resource situations without sacrificing RT-  
144 PCR sensitivity and specificity. Importantly, a pooling strategy can reduce turnaround times for  
145 prompt identification and isolation of infected individuals to effectively curb the transmission of  
146 COVID-19 and other infectious disease outbreaks.

147

#### 148 **Acknowledgements:**

149 We thank the Landstuhl Regional Medical Center Department of Virology staff for their  
150 assistance with specimen processing. The views expressed belong to the author(s) and do not  
151 represent the official views of the United States Government, Department of Defense or  
152 Landstuhl Regional Medical Center.

153

#### 154 **Declarations of Interests:**

155 | None

156

157 **References:**

- 158 1. Wu, F. *et al.* A new coronavirus associated with human respiratory disease in China.  
159 *Nature* **579**, 265–269 (2020).
- 160 2. Huang, C. *et al.* Clinical features of patients infected with 2019 novel coronavirus in  
161 Wuhan, China. *Lancet* **395**, 497–506 (2020).
- 162 3. WHO Director-General’s remarks at the media briefing on 2019-nCoV on 11 February  
163 2020. Available at: [https://www.who.int/dg/speeches/detail/who-director-general-s-](https://www.who.int/dg/speeches/detail/who-director-general-s-remarks-at-the-media-briefing-on-2019-ncov-on-11-february-2020)  
164 [remarks-at-the-media-briefing-on-2019-ncov-on-11-february-2020](https://www.who.int/dg/speeches/detail/who-director-general-s-remarks-at-the-media-briefing-on-2019-ncov-on-11-february-2020). (Accessed: 8th April  
165 2020)
- 166 4. Zhou, P. *et al.* A pneumonia outbreak associated with a new coronavirus of probable bat  
167 origin. *Nature* **579**, 270–273 (2020).
- 168 5. World Health Organization: Coronavirus disease (COVID-19) Situation Report-116.  
169 Available at: [https://www.who.int/docs/default-source/coronaviruse/situation-](https://www.who.int/docs/default-source/coronaviruse/situation-reports/20200515-covid-19-sitrep-116.pdf?sfvrsn=8dd60956_2)  
170 [reports/20200515-covid-19-sitrep-116.pdf?sfvrsn=8dd60956\\_2](https://www.who.int/docs/default-source/coronaviruse/situation-reports/20200515-covid-19-sitrep-116.pdf?sfvrsn=8dd60956_2). (Accessed: 16th May  
171 2020)
- 172 6. Coronavirus (COVID-19) Update: FDA Issues first Emergency Use Authorization for Point  
173 of Care Diagnostic | FDA. Available at: [https://www.fda.gov/news-events/press-](https://www.fda.gov/news-events/press-announcements/coronavirus-covid-19-update-fda-issues-first-emergency-use-authorization-point-care-diagnostic)  
174 [announcements/coronavirus-covid-19-update-fda-issues-first-emergency-use-](https://www.fda.gov/news-events/press-announcements/coronavirus-covid-19-update-fda-issues-first-emergency-use-authorization-point-care-diagnostic)  
175 [authorization-point-care-diagnostic](https://www.fda.gov/news-events/press-announcements/coronavirus-covid-19-update-fda-issues-first-emergency-use-authorization-point-care-diagnostic). (Accessed: 7th April 2020)
- 176 7. Van, T. T. *et al.* Pooling nasopharyngeal/throat swab specimens to increase testing  
177 capacity for influenza viruses by PCR. *J. Clin. Microbiol.* **50**, 891–896 (2012).
- 178 8. Emmanuel, J. C., Bassett, M. T., Smith, H. J. & Jacobs, J. A. Pooling of sera for human  
179 immunodeficiency virus (HIV) testing: An economical method for use in developing  
180 countries. *J. Clin. Pathol.* **41**, 582–585 (1988).
- 181 9. Currie, M. J., McNiven, M., Yee, T., Schiemer, U. & Bowden, F. J. Pooling of clinical  
182 specimens prior to testing for Chlamydia trachomatis by PCR is accurate and cost saving.  
183 *J. Clin. Microbiol.* **42**, 4866–4867 (2004).
- 184 10. Mine, H. *et al.* High throughput screening of 16 million serologically negative blood  
185 donors for hepatitis B virus, hepatitis C virus and human immunodeficiency virus type-1  
186 by nucleic acid amplification testing with specific and sensitive multiplex reagent in  
187 Japan. *J. Virol. Methods* **112**, 145–151 (2003).
- 188 11. Lindan, C. *et al.* Utility of pooled urine specimens for detection of Chlamydia trachomatis  
189 and Neisseria gonorrhoeae in men attending public sexually transmitted infection clinics  
190 in Mumbai, India, by PCR. *J. Clin. Microbiol.* **43**, 1674–1677 (2005).
- 191 12. Yelin, I. *et al.* Evaluation of COVID-19 RT-qPCR test in multi-sample pools. *medRxiv*  
192 2020.03.26.20039438 (2020). doi:10.1101/2020.03.26.20039438
- 193 13. Lohse, S. *et al.* Pooling of samples for testing for SARS-CoV-2 in asymptomatic people.  
194 *Lancet Infect. Dis.* doi:10.1016/S1473-3099(20)30362-5
- 195 14. Noriega, R. & Samore, M. H. Increasing testing throughput and case detection with a  
196 pooled-sample Bayesian approach in the context of COVID-19.  
197 doi:10.1101/2020.04.03.024216
- 198 15. FDA Takes Significant Step in Coronavirus Response Efforts, Issues Emergency Use  
199 Authorization for the First 2019 Novel Coronavirus Diagnostic | FDA. Available at:



200            [https://www.fda.gov/news-events/press-announcements/fda-takes-significant-step-](https://www.fda.gov/news-events/press-announcements/fda-takes-significant-step-coronavirus-response-efforts-issues-emergency-use-authorization-first)  
201            [coronavirus-response-efforts-issues-emergency-use-authorization-first](https://www.fda.gov/news-events/press-announcements/fda-takes-significant-step-coronavirus-response-efforts-issues-emergency-use-authorization-first). (Accessed: 7th  
202            April 2020)  
203    16.    Phillips, C. *BioFire COVID-19 Test Emergency Use Authorization*. (2020).  
204  
205

**Table 1.** RT-PCR C<sub>T</sub> values of pooled specimens positive for SARS-CoV-2

| Positive Pool | Ct Values |      |         |
|---------------|-----------|------|---------|
|               | N1        | N2   | Rnase-P |
| 2             | 28.6      | 29.7 | 31.8    |
| 8             | 25.4      | 26.2 | 25.7    |
| 11            | 35.9      | 38.7 | 33.7    |
| 12            | 29.7      | 31   | 32.5    |
| 13            | 30.7      | 32.1 | 31.4    |
| 15*           | 29.5      | 30.3 | 30.1    |
| 18            | 27.1      | 27.6 | 25.2    |
| 19            | 20.7      | 20.9 | 25.1    |
| 20*           | 26.3      | 26.8 | 25.2    |
| 22            | 29.5      | 30.3 | 30.1    |
| 25            | 30        | 29.3 | 25.8    |
| 41*†          | 37.3      | Und. | 26.5    |
| 43*           | 23.5      | 23.5 | 27      |
| 47            | 30.9      | 31.3 | 26.2    |
| 50            | 33.6      | 33.3 | 26.2    |

\* Pool containing 2 positive specimens

† Inconclusive RT-PCR result

Und.: Undetected

**Table 2.** RT-PCR C<sub>T</sub> values of individual specimens positive for SARS-CoV-2

| Pool | Sample | Ct Values |      |         |
|------|--------|-----------|------|---------|
|      |        | N1        | N2   | Rnase-P |
| 2    | 2696   | 25.2      | 26.2 | 27.6    |
| 8    | 2610   | 24.7      | 26.1 | 28.6    |
| 11   | 2535   | 31        | 34.7 | 25.9    |
| 12   | 2697   | 23.9      | 34.9 | 30.4    |
| 13   | 2624   | 21.1      | 21.9 | 28.3    |
| 15   | 2595   | 29.3      | 30.6 | 29.5    |
| 15   | 2620   | 26.3      | 31.6 | 29.1    |
| 18   | 2586   | 29.4      | 32.1 | 26.7    |
| 19   | 2803   | 20.4      | 21.3 | 27.9    |
| 20   | 2665   | 30        | 31.5 | 28.6    |
| 20   | 2785   | 27.5      | 29   | 25.6    |
| 25   | 2662   | 29.5      | 30.6 | 27.8    |
| 41   | 3010   | 33.5      | 32.2 | 28      |
| 41   | 2975   | 36.1      | 36   | 27.1    |
| 43   | 3186   | 35        | 38.4 | 29.3    |
| 43   | 3202   | 24.2      | 25.3 | 32.1    |
| 47   | 3164   | 30.2      | 31.8 | 30      |
| 50   | 3104   | 31.3      | 30.5 | 22.9    |
| 22   | 2497   | 23.2      | 23.4 | 26.4    |

**Table 3.** CDC 2019-nCoV RT-PCR and BioFire COVID-19 comparator analysis

|                      |          | BioFire COVID-19 Test |          |
|----------------------|----------|-----------------------|----------|
|                      |          | Positive              | Negative |
| CDC 2019-nCoV RT-PCR | Positive | 15                    | 0        |
|                      | Negative | 0                     | 15       |

**Figure 1.** Comparison of mean  $C_T$  value between positive pooled and individually tested samples. Data are represented as the mean  $\pm$  standard error the mean.

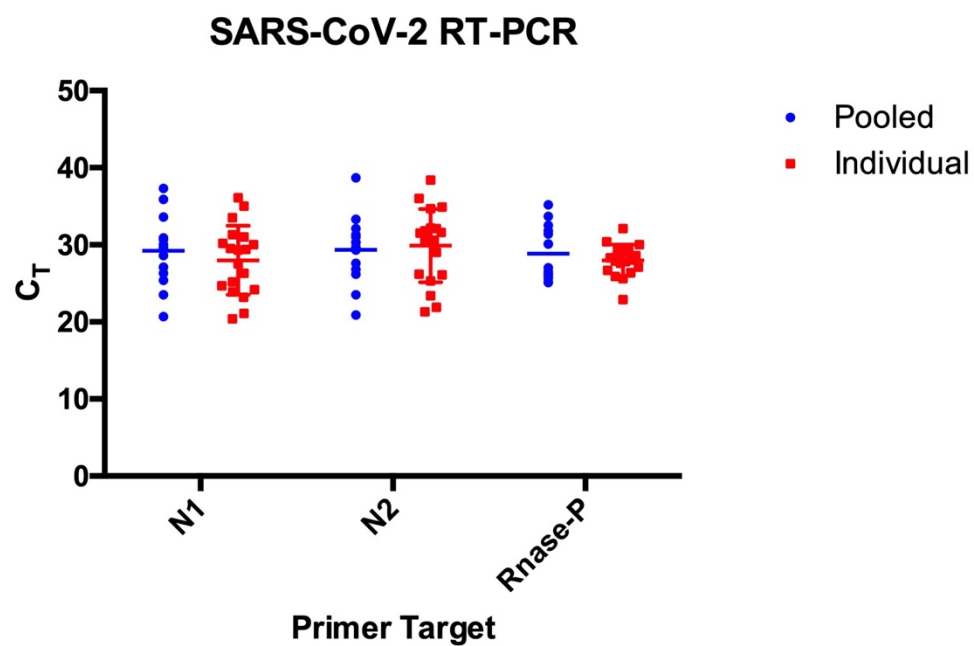

Source: http://biorxiv.org/content/10.1101/2020.05.22.110932v1.full.pdf
